# Supplementary material for: Assessment of disability and disease burden in neuromyelitis optica spectrum disorders in the CIRCLES Cohort
Source: PubMed Central journal article supplement (PMC11525583; doi:10.1038/s41598-024-75013-z), 2024-10-30
Supplement: 41598_2024_75013_MOESM1_ESM.pdf [file 41598_2024_75013_MOESM1_ESM.pdf]

## **Supplementary Resources**

### **Assessment of Disability and Disease Burden in Neuromyelitis Optica Spectrum**

#### **Disorders in the CIRCLES Cohort**

**Authors:** Shervin Gholizadeh,<sup>1†</sup> Alex Exuzides,<sup>1†</sup> Jennifer Sinnott,<sup>2,3</sup> Chella Palmer,<sup>3</sup> Michael Waltz,<sup>3</sup> John W. Rose,<sup>3</sup> Anna Marie Jolley,<sup>3</sup> Jacinta M. Behne,<sup>4</sup> Megan K. Behne,<sup>4</sup> Terrence F. Blaschke,<sup>5</sup> Terry J. Smith,<sup>6</sup> Katelyn E. Lewis,<sup>3</sup> Lawrence J. Cook<sup>3‡</sup> and Michael R. Yeaman<sup>7\*†</sup> on behalf of The Guthy-Jackson Charitable Foundation CIRCLES Study Group<sup>§</sup>

**Author affiliations:** <sup>1</sup>Genentech, Inc., South San Francisco, CA, USA; <sup>2</sup>Department of Statistics, The Ohio State University, Columbus, OH, USA; <sup>3</sup>University of Utah School of Medicine, Salt Lake City, UT, USA; <sup>4</sup>The Guthy-Jackson Charitable Foundation, Beverly Hills, CA, USA; <sup>5</sup>Departments of Medicine and Molecular Pharmacology, Stanford University School of Medicine, Stanford, CA, USA; <sup>6</sup>University of Michigan Kellogg Eye Center, Ann Arbor, MI, USA; <sup>7</sup>David Geffen School of Medicine at University of California, Los Angeles (UCLA), Los Angeles, CA, USA, and the Lundquist Institute for Biomedical Innovation at Harbor-UCLA Medical Center, Torrance, CA, USA.

†These two authors contributed equally to this work.

‡These two authors contributed equally to this work.

§See appendix Supplementary Resource 1 for list of The Guthy-Jackson Charitable Foundation CIRCLES Study Group Co-Investigators

## **Supplementary Resource 1: Co-Investigators/Affiliated Co-Authors**

### **Extramural Members of The Guthy-Jackson Charitable Foundation CIRCLES Study**

**Group:** Jeffrey L. Bennett, MD, PhD, Departments of Neurology and Ophthalmology, University of Colorado School of Medicine, Aurora, CO, USA. Participated in data collection, analysis interpretation and review of the manuscript. Eric C. Klawiter, MD, Department of Neurology, Massachusetts General Hospital, Harvard Medical School, Boston, MA, USA. Participated in data collection, analysis interpretation and review of the manuscript. Michael Levy, MD, PhD, Department of Neurology, Massachusetts General Hospital, Harvard Medical School, Boston, MA, USA. Participated in data collection, analysis interpretation and review of the manuscript. Sarah M. Planchon, PhD, Mellen Center for MS Treatment and Research, Neurological Institute, Cleveland Clinic, Cleveland, OH, USA. Participated in data collection, analysis interpretation and review of the manuscript. Pavle Repovic, MD, PhD, Swedish Medical Center, Seattle, WA, USA. Participated in data collection, analysis interpretation and review of the manuscript. Claire S. Riley, MD, Department of Neurology, Columbia University Medical Center, New York, NY, USA. Participated in data collection, analysis interpretation and review of the manuscript. Nancy L. Sicotte, MD, Cedars-Sinai Medical Center, Los Angeles, CA, USA. Participated in data collection, analysis interpretation and review of the manuscript. Ben Thrower, MD, Shepherd Center, Atlanta, GA, USA. Participated in data collection, analysis interpretation and review of the manuscript. Anthony Traboulsee, MD, Department of Medicine & Neurology, University of British Columbia, Vancouver BC, Canada. Participated in data collection, analysis interpretation and review of the manuscript.

**Supplementary Resource 2.** Summary of CIRCLES patient study file

| Event      | Form                                      | Cohort |         |
|------------|-------------------------------------------|--------|---------|
|            |                                           | Case   | Control |
| Enrollment | Inclusion/Exclusion                       | X      | X       |
|            | Demographic Information                   | X      | X       |
|            | Control Characteristics                   |        | X       |
| Baseline   | Case Baseline Encounter Summary           | X      |         |
|            | Control Baseline Encounter Summary        |        | X       |
|            | Baseline Environmental Exposures Summary  | X      | X       |
|            | Baseline Activities of Daily Living       | X      | X       |
|            | Baseline Autoimmune Diseases              | X      | X       |
|            | Baseline Medications and Treatments       | X      | X       |
|            | Baseline Surgical and Medical Procedures  | X      | X       |
|            | Baseline Vaccinations                     | X      | X       |
| Follow-up  | Current Most Likely Diagnosis             | X      |         |
|            | Case Follow-up Encounter Summary          | X      |         |
|            | Control Follow-up Encounter Summary       |        | X       |
|            | Follow-up Environmental Exposures Summary | X      | X       |
|            | Follow-up Activities of Daily Living      | X      | X       |
|            | Current Most Likely Diagnosis             | X      |         |

### Supplementary Resource 3. Neurological examination for CIRCLES

|                                                                      |                                                       |     |    |
|----------------------------------------------------------------------|-------------------------------------------------------|-----|----|
| <b>Prospective Forms</b>                                             |                                                       |     |    |
| Documentation from clinical record, ROS, vitals & interval history   |                                                       |     |    |
| Make sure clinical records for visits includes:                      |                                                       |     |    |
| ROS – List std. general/other vomiting hiccups (yes/no)              |                                                       |     |    |
| Std vital signs                                                      |                                                       |     |    |
| Interval symptoms – vision, motor, spinal cord, brainstem, cognition |                                                       |     |    |
| <b>Condensed Neurological Examination</b>                            |                                                       |     |    |
| Standard Neurological Examination specialized below                  |                                                       |     |    |
| With special attention to Visual Acuity                              |                                                       |     |    |
| 25 ft walk: Record ambulation time                                   |                                                       |     |    |
| Kurtzke scale                                                        |                                                       |     |    |
| <b>Details of Neurological Examination</b>                           |                                                       |     |    |
| All CNS (I-XII):                                                     | N                                                     | Abn | NT |
| Visual Acuity:                                                       | Snellen Chart Visualized – OS & OD                    |     |    |
|                                                                      | Worse than 20/400                                     |     |    |
|                                                                      | 20/400 (6/120)                                        |     |    |
|                                                                      | 20/200 (6/60)                                         |     |    |
|                                                                      | 20/100 (6/30)                                         |     |    |
|                                                                      | 20/70 (6/21)                                          |     |    |
|                                                                      | 20/50 (6/15)                                          |     |    |
|                                                                      | 20/40 (6/12)                                          |     |    |
|                                                                      | 20/30 (6/9)                                           |     |    |
|                                                                      | 20/25 (6/7.5)                                         |     |    |
|                                                                      | 20/20 (6/6)                                           |     |    |
|                                                                      | 20/15 (6/4.5)                                         |     |    |
|                                                                      | Not documented                                        |     |    |
|                                                                      | If not visualized – CF or HM or LP only – Blind (NLP) |     |    |
| Motor – strength all 4 exts. / by std. scale 0-5/exts.               |                                                       |     |    |
| Coordination – cerebellar ataxia on either or both sides             |                                                       |     |    |
| DTR absent to clonus 0-4 std. scale – upper & lower ext. – all sites |                                                       |     |    |
| Other reflexes required – Hoffman & Babinski                         |                                                       |     |    |

|                                                                                                                                |
|--------------------------------------------------------------------------------------------------------------------------------|
| Sensory – all extremities mobility, pinprick, superficial touch, temp (document sensory levels)                                |
| Vibration (level of impairment)                                                                                                |
| Proprioception (level of impairment) – Each level (upper extremity) Finger, Wrist, Elbow<br>(lower extremity) Toe, Ankle, Knee |
| Bowel/Bladder function – Normal, Mild, Severe Include: Symptom/Catheter                                                        |

### Neurological Episode for CIRCLES

|                          |                                            |                     |
|--------------------------|--------------------------------------------|---------------------|
| Date of Onset:           | Date                                       |                     |
| 1 <sup>st</sup> episode: | Y/N                                        |                     |
| Recovery:                | Complete/Incomplete/No Recovery            |                     |
| Duration in days:        | Duration (number of days)/ Ongoing/Unknown |                     |
| Dx of NMOSD:             | New/Established/undetermined/If No-Specify |                     |
| TM:                      | Extensive/Non-Extensive                    |                     |
| ON:                      | OD                                         |                     |
|                          | OS                                         |                     |
|                          | Both                                       |                     |
|                          | Chiasmal                                   |                     |
| Brain Syndromes:         | Brainstem                                  | Cerebral Hemisphere |

| <b>Episode Symptoms:</b>     | <b>Present: Y/N</b> | <b>New/Worsening/No Change</b> |
|------------------------------|---------------------|--------------------------------|
| Anorexia                     |                     |                                |
| Mental deterioration         |                     |                                |
| Narcolepsy                   |                     |                                |
| Psychiatric symptoms         |                     |                                |
| Hypothalamic dysfunction     |                     |                                |
| Visual acuity                |                     |                                |
| Facial motor abnormal        |                     |                                |
| Facial sensory abnormal      |                     |                                |
| Hiccups (recalcitrant)       |                     |                                |
| Hypoacusia                   |                     |                                |
| Nausea                       |                     |                                |
| Oculomotor impairment        |                     |                                |
| Speech/swallowing impairment |                     |                                |
| Vertigo                      |                     |                                |
| Vomiting (persistent)        |                     |                                |
| Bladder/bowel dysfunction    |                     |                                |
| Lhermitte's sign             |                     |                                |
| Lower extremity dysfunction  |                     |                                |

|                                           |
|-------------------------------------------|
| Sensory symptoms (e.g. pain, paresthesia) |
| Sexual dysfunction                        |
| Upper extremity dysfunction               |
| Walking difficulties                      |
| Fatigue/weakness                          |
| Spasms                                    |
| Other                                     |

**Supplementary Resource 4: CIRCLES Baseline Activities of Daily Living**

# **BASELINE ACTIVITIES OF DAILY LIVING FORM**

**Please note: Each page of the Baseline Activities of Daily Living Form contains instructions for completing any data fields that may be difficult or confusing. Please refer to the left hand side of the page for detailed data completion guidelines.**

## BASELINE ACTIVITIES OF DAILY LIVING FORM

**General Form Instructions:**

---

This form should be completed by interviewing the participant. This form is completed only once at baseline. Refer to the Follow-up Activities of Daily Living Form each time contact is made after the baseline encounter.

**Question 1:**

---

Please choose "Full-time" if the participant is able to do 8+ hours a day of school/work/housework activities.

Please choose "Part-time" if the participant is able to do less than 8 hours a day of school/work/housework activities.

Enter the date the last time the participant was able to attend school/work/do housework full-time. Date may be entered as a complete date (DD-MMM-YYYY) if known, or as a partial date if complete date is not known (MMM-YYYY or YYYY.)

If the day is unknown, check the "day unknown" box.

If the month is unknown, check the "month unknown" box.

Year must be provided for first episode onset and most recent episode.

**Question 2:**

---

Please choose "completely" if the participant is not able to care for themselves or live alone without significant assistance from another person.

Please choose "partially" if the participant can generally function by themselves with only occasional assistance from another person to complete day to day tasks.

**BASELINE ACTIVITIES OF DAILY LIVING FORM**  
**FORM PAGE 1 OF 2**

**Participant: Activities of Daily Living**

**Instrumental ADLs**

**1. Is the participant able to attend school/work/do housework?**

- Yes
- No

**a. If yes, specify:**

- Full-time
- Part-time

**b. If part-time, when was the last time the participant was able to attend school/work/do housework full-time?**

**Date:** \_\_\_\_\_ - \_\_\_\_\_ - \_\_\_\_\_  
                  DD   MMM   YYYY

**Day unknown \_\_\_\_\_ Month unknown \_\_\_\_\_**

**2. Is the participant dependent on others for care?**

- Completely
- Partially
- No

## BASELINE ACTIVITIES OF DAILY LIVING FORM

**General Form Instructions:**

---

This form should be completed by interviewing the participant. This form is completed only once at baseline. See instruction on page 2.

**Table:**

---

**Specify the participant's capabilities to perform the basic ADLs.**

**Level of ability to perform for Bathing/Showering through Personal Grooming:**

Choose "Independent" if the participant never requires assistance to complete this task.  
 Choose "Partially Dependent" if the participant requires assistance part of the time to complete this task.  
 Choose "Completely Dependent" if the participant always requires assistance to complete this task.

**Level of ability to perform for Mobility:**

Choose "Independent" if the participant never requires assistance to complete this task.  
 Choose "Partially Dependent" if the participant requires assistance part of the time to complete this task.  
 Choose "Completely Dependent" if the participant always requires assistance to complete this task.  
 Choose "Bedbound" if the participant is unable to use any assisted devices.

Bedbound – Confined or unable to leave one's bed because of infirmity, weakness or illness.

**Question 3:**

---

Question 3 is answered only if the Mobility level in the ADL table is answered as 'partially dependent'.

If "Yes", please document which type of mobility assistance device is used.

One point assistance includes the use of a cane, rail, or another person (unilateral assistance.)  
 Two point assistance includes the use of two canes, or a walker (bilateral assistance). If using a cane and a person, this should be marked as two point assistance.

**Question 4:**

---

Question 4 is answered only if the Mobility level in the Basic ADLs table is answered as 'completely dependent.'

If "Yes," please document which type of mobility assistance device is used.

One point assistance includes the use of a cane, rail, or another person (unilateral assistance.)  
 Two point assistance includes the use of two canes, or a walker (bilateral assistance.) If using a cane and a person, this should be marked as two point assistance.

**BASELINE ACTIVITIES OF DAILY LIVING FORM**  
**FORM PAGE 2 OF 2**

**Basic ADLs**

**2a.**

| Activity                 | Level of ability to perform                                                                                                                                                |
|--------------------------|----------------------------------------------------------------------------------------------------------------------------------------------------------------------------|
| Bathing/Showering        | <input type="checkbox"/> Independent<br><input type="checkbox"/> Partially Dependent<br><input type="checkbox"/> Completely Dependent                                      |
| Bowel/Bladder Management | <input type="checkbox"/> Independent<br><input type="checkbox"/> Partially Dependent<br><input type="checkbox"/> Completely Dependent                                      |
| Food Preparation         | <input type="checkbox"/> Independent<br><input type="checkbox"/> Partially Dependent<br><input type="checkbox"/> Completely Dependent                                      |
| Eating                   | <input type="checkbox"/> Independent<br><input type="checkbox"/> Partially Dependent<br><input type="checkbox"/> Completely Dependent                                      |
| Dressing                 | <input type="checkbox"/> Independent<br><input type="checkbox"/> Partially Dependent<br><input type="checkbox"/> Completely Dependent                                      |
| Personal Grooming        | <input type="checkbox"/> Independent<br><input type="checkbox"/> Partially Dependent<br><input type="checkbox"/> Completely Dependent                                      |
| Mobility                 | <input type="checkbox"/> Independent<br><input type="checkbox"/> Partially Dependent<br><input type="checkbox"/> Completely Dependent<br><input type="checkbox"/> Bedbound |

**3. If mobility level above is marked "Partially Dependent," are any assistance devices used?**

- Yes  
 No

**a. If yes, specify (check all that apply):**

- One point assistance  
 Two point assistance  
 Wheelchair

**4. If mobility level above is marked "Completely Dependent," are any assistance devices used?**

- Yes  
 No

**a. If yes, specify (check all that apply):**

- One point assistance  
 Two point assistance  
 Wheelchair
